# 1 **Regeneration Rosetta: An interactive web application to explore** 2 **regeneration-associated gene expression and chromatin accessibility**

3 Andrea Rau<sup>1,2</sup>, Sumona P. Dhara<sup>3</sup>, Ava J. Udvadia<sup>3</sup>, Paul L. Auer<sup>2</sup>

4 <sup>1</sup> GABI, INRA, AgroParisTech, Université Paris-Saclay, 78350, Jouy-en-Josas, France

5 <sup>2</sup> Joseph J. Zilber School of Public Health, University of Wisconsin-Milwaukee, Milwaukee, WI 53201, USA

6 <sup>3</sup> Department of Biological Sciences, University of Wisconsin-Milwaukee, Milwaukee, WI 53201, USA

7  
8 **Abstract** Time-course high-throughput assays of gene expression and enhancer usage in  
9 zebrafish provide a valuable characterization of the dynamic mechanisms governing gene  
10 regulatory programs during CNS axon regeneration. To facilitate the exploration and functional  
11 interpretation of a set of fully-processed data on regeneration-associated temporal transcription  
12 networks, we have created an interactive web application called *Regeneration Rosetta*. Using  
13 either built-in or user-provided lists of genes in one of dozens of supported organisms, our web  
14 application facilitates the (1) visualization of clustered temporal expression trends; (2)  
15 identification of proximal and distal regions of accessible chromatin to expedite downstream motif  
16 analysis; and (3) description of enriched functional gene ontology categories. By enabling a  
17 straightforward interrogation of these rich data without extensive bioinformatic expertise,  
18 *Regeneration Rosetta* is broadly useful for both a deep investigation of time-dependent regulation  
19 during regeneration in zebrafish and hypothesis generation in other organisms.

20 **Keywords** CNS axon regeneration; gene expression; chromatin accessibility; functional  
21 enrichment; zebrafish; R/Shiny

## 22 **Introduction**

23 Axon degeneration accompanying central nervous system (CNS) injury or disease leads to a  
24 permanent loss of function in human patients. This is largely due to an inability of mammals to  
25 reinitiate axon growth in adult CNS neurons<sup>1</sup>. In contrast to mammals, adult teleost fish can fully  
26 regenerate CNS axons that reinnervate appropriate targets, enabling functional recovery from  
27 CNS injury<sup>2</sup>. Interestingly, fish and mammals share common mechanisms for wiring the nervous  
28 system during development, and both are known to downregulate developmental growth and

29 guidance signaling pathways during nervous system maturation<sup>3-4</sup>. Thus, what appears to set fish  
30 apart is the ability to re-initiate a sustained program of axon growth in response to CNS injury.

31  
32 Transcriptional changes have long been correlated with the intrinsic capacity for regenerative  
33 axon growth<sup>5,6</sup>. In order to understand the precise mechanisms governing gene regulatory  
34 programs during CNS axon regeneration, Dhara et al. (2019)<sup>7</sup> recently identified the dynamic  
35 changes in gene expression and enhancer usage in zebrafish over the full time-course of axon  
36 regeneration in CNS neurons that are capable of successful regeneration. Adult zebrafish were  
37 subjected to optic nerve crush injury, and regenerating retinas were dissected at various time-  
38 points post injury in order to identify the interactions among expressed genes, open chromatin,  
39 and transcription factor expression during CNS axon regeneration.

40  
41 These data on regeneration-associated temporal transcription networks in zebrafish represent a  
42 rich source of information with wide potential use and insight for the broader regeneration  
43 community. To this end, we provide fully processed data from Dhara et al. (2019) in an interactive  
44 web application, *Regeneration Rosetta*, as a means to explore, visualize, and functionally  
45 interpret regeneration-associated gene expression and chromatin accessibility. Using either built-  
46 in lists of differentially expressed (DE) genes from Dhara et al. (2019) or user-provided gene lists  
47 in one of 69 supported organisms from Ensembl (Table 1), our web application facilitates (i)  
48 customized visualization of clustered temporal expression trends during optic nerve regeneration;  
49 (ii) identification of proximal and distal regions of open chromatin relative to the gene list to  
50 expedite downstream motif analysis via the MEME suite<sup>8</sup>; and (iii) gene ontology (GO) functional  
51 enrichment analysis. Similarly, using either built-in lists of differentially accessible chromatin from  
52 Dhara et al. (2019) or user-provided genomic coordinates of accessible chromatin, the application  
53 identifies proximal and distal genes relative to their position and their corresponding enriched GO  
54 categories.

| Species                           | Genome version  | Species                         | Genome version |
|-----------------------------------|-----------------|---------------------------------|----------------|
| <i>Danio rerio</i>                | GRCz10          | <i>Meleagris gallopavo</i>      | UMD2           |
| <i>Homo sapiens</i>               | GRCh38.p5       | <i>Microcebus murinus</i>       | micMur1        |
| <i>Mus musculus</i>               | GRCm38.p4       | <i>Monodelphis domestica</i>    | monDom5        |
| <i>Rattus norvegicus</i>          | Rnor_6.0        | <i>Mustela putorius furo</i>    | MusPutFur1.0   |
| <i>Ailuropoda melanoleuca</i>     | ailMel1         | <i>Myotis lucifugus</i>         | myoLuc2        |
| <i>Anas platyrhynchos</i>         | BGI_duck_1.0    | <i>Nomascus leucogenys</i>      | Nleu1.0        |
| <i>Anolis carolinensis</i>        | AnoCar2.0       | <i>Ochotona princeps</i>        | OchPri2.0      |
| <i>Astyanax mexicanus</i>         | AstMex102       | <i>Oreochromis niloticus</i>    | Orenil1.0      |
| <i>Bos taurus</i>                 | UMD3.1          | <i>Ornithorhynchus anatinus</i> | OANA5          |
| <i>Caenorhabditis elegans</i>     | WBcel235        | <i>Oryctolagus cuniculus</i>    | OryCun2.0      |
| <i>Callithrix jacchus</i>         | C_jacchus3.2.1  | <i>Oryzias latipes</i>          | HdrR           |
| <i>Canis familiaris</i>           | CanFam3.1       | <i>Otolemur garnettii</i>       | OtoGar3        |
| <i>Cavia porcellus</i>            | cavPor3         | <i>Ovis aries</i>               | Oar_v3.1       |
| <i>Chlorocebus sabaeus</i>        | ChlSab1.1       | <i>Pan troglodytes</i>          | CHIMP2.1.4     |
| <i>Choloepus hoffmanni</i>        | choHof1         | <i>Papio anubis</i>             | PapAnu2.0      |
| <i>Ciona intestinalis</i>         | KH              | <i>Pelodiscus sinensis</i>      | PelSin_1.0     |
| <i>Ciona savignyi</i>             | CSAV2.0         | <i>Petromyzon marinus</i>       | Pmarinus_7.0   |
| <i>Dasypus novemcinctus</i>       | Dasnov3.0       | <i>Poecilia formosa</i>         | PoeFor_5.1.2   |
| <i>Dipodomys ordii</i>            | dipOrd1         | <i>Pongo abelii</i>             | PPYG2          |
| <i>Drosophila melanogaster</i>    | BDGP6           | <i>Procapra capensis</i>        | proCap1        |
| <i>Echinops telfairi</i>          | TENREC          | <i>Pteropus vampyrus</i>        | pteVam1        |
| <i>Equus caballus</i>             | EquCab2         | <i>Saccharomyces cerevisiae</i> | R64-1-1        |
| <i>Erinaceus europaeus</i>        | eriEur1         | <i>Sarcophilus harrisii</i>     | DEVIL7.0       |
| <i>Felis catus</i>                | Felis_catus_6.2 | <i>Sorex araneus</i>            | sorAra1        |
| <i>Ficedula albicollis</i>        | FicAlb_1.4      | <i>Sus scrofa</i>               | Sscrofa10.2    |
| <i>Gadus morhua</i>               | gadMor1         | <i>Taeniopygia guttata</i>      | taeGut3.2.4    |
| <i>Gallus gallus</i>              | Galgal4         | <i>Takifugu rubripes</i>        | FUGU4.0        |
| <i>Gasterosteus aculeatus</i>     | BROADS1         | <i>Tarsius syrichta</i>         | tarSyrl        |
| <i>Gorilla gorilla</i>            | gorGor3.1       | <i>Tetraodon nigroviridis</i>   | TETRAODON8.0   |
| <i>Ictidomys tridecemlineatus</i> | spetri2         | <i>Tupaia belangeri</i>         | tupBel1        |
| <i>Latimeria chalumnae</i>        | LatChal         | <i>Tursiops truncatus</i>       | turTru1        |
| <i>Lepisosteus oculatus</i>       | LepOcul         | <i>Vicugna pacos</i>            | vicPac1        |
| <i>Loxodonta africana</i>         | loxAfr3         | <i>Xenopus tropicalis</i>       | JGI4.2         |
| <i>Macaca mulatta</i>             | MMUL_1          | <i>Xiphophorus maculatus</i>    | Xipmac4.4.2    |
| <i>Macropus eugenii</i>           | Meug_1.0        |                                 |                |

**Table 1.** List of supported organisms and their associated genome version for user-provided gene set queries in the *Regeneration Rosetta* app.

55 The *Regeneration Rosetta* app represents a new paradigm to facilitate data sharing and re-use  
56 in the field of regeneration. This type of data sharing directly promotes the National Institutes of  
57 Health guidelines for ensuring rigor and reproducibility in pre-clinical research  
58 ([https://www.nih.gov/research-training/rigor-reproducibility/principles-guidelines-reporting-](https://www.nih.gov/research-training/rigor-reproducibility/principles-guidelines-reporting-preclinical-research)  
59 [preclinical-research](https://www.nih.gov/research-training/rigor-reproducibility/principles-guidelines-reporting-preclinical-research)). As large-scale genomic data become more common, tools that allow  
60 rapid querying and exploration of fully processed data (without the need for additional coding or  
61 pre-processing steps) will be critical in accelerating advances in the regeneration field.

## 62 Results

### 63 *Regeneration Rosetta yields insight into cholesterol and lipid biosynthesis regulation* 64 *during regeneration*

65 Cholesterol biosynthesis pathways were found to be enriched during regeneration in Dhara et al.  
66 (2019) and have been previously shown to be important in axon regeneration in mouse<sup>17</sup>. To  
67 more deeply investigate their behavior during optic nerve regeneration in zebrafish and  
68 demonstrate some of the capabilities of the *Regeneration Rosetta*, we input a list of 125 genes  
69 with cholesterol-related GO terms obtained from the Mouse Genome Informatics (MGI)  
70 database<sup>18</sup> (Table S2), corresponding to 236 expressed zebrafish transcripts, into the  
71 *Regeneration Rosetta* app (Fig. 1).

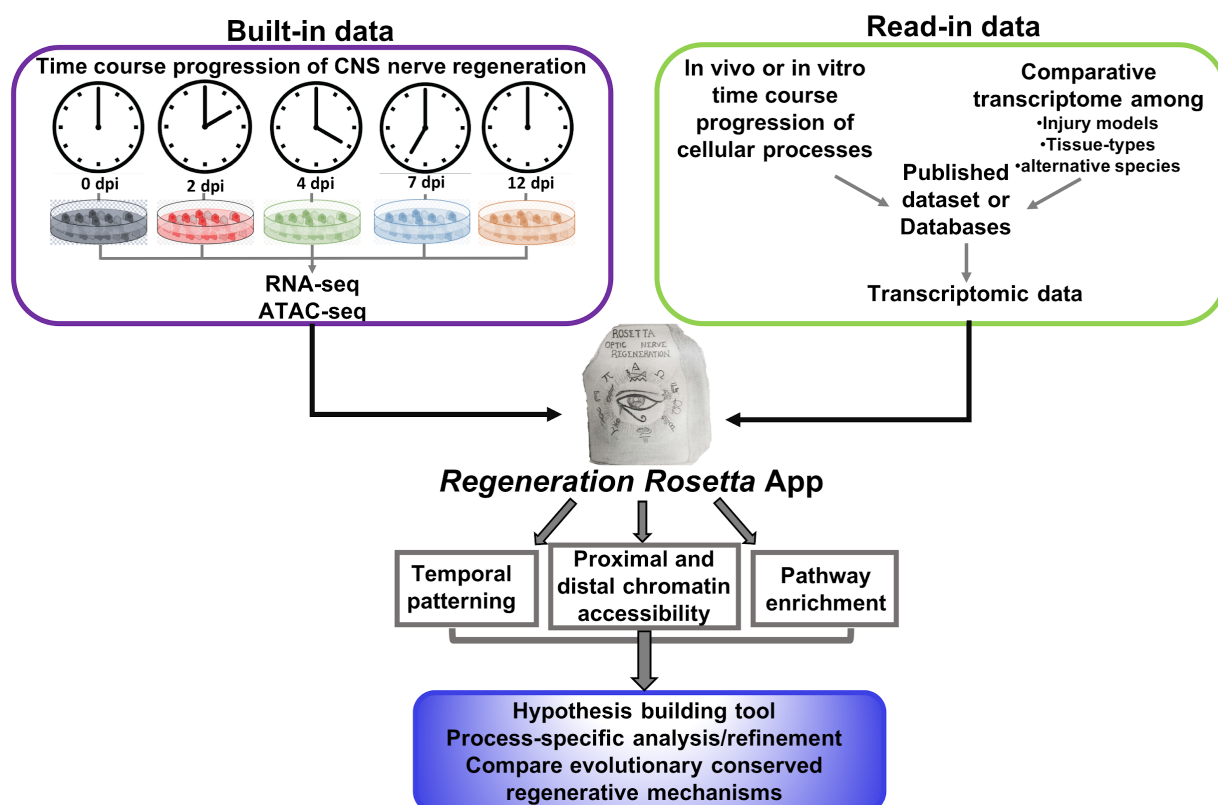

72 **Figure 1: Workflow of *Regeneration Rosetta* app.** Workflow for investigating temporal patterning of  
73 regeneration-associated genes classified within specific biological processes and/or comparative  
74 evolutionary analysis of the conserved mechanism among regenerative species, using the *Regeneration*  
75 *Rosetta* app.  
76

77

78 Of these 236 transcripts, 64 were DE in Dhara et al. (2019); focusing on this subset of transcripts,  
79 the *Regeneration Rosetta* produces a clustered heatmap of expression Z-scores across distinct  
80 stages of optic nerve regeneration (Figure 2A). Using on the associated GO terms from MGI, we  
81 found that the twenty transcripts with peak expression early in regeneration during the phase of  
82 growth towards the midline (2-4 dpi) were predominantly enriched in cholesterol metabolic genes,  
83 while the majority of those peaking during the midline crossing and target selection phases (4-7  
84 dpi) were enriched in cholesterol biosynthetic pathways (Figure 2B). Interestingly, transcripts  
85 differentially down-regulated during regeneration were enriched in negative regulation of  
86 cholesterol biosynthetic processes.

87 Among the cholesterol biosynthetic genes, we observed upregulation during mid-regeneration (4-  
88 7 dpi) of SREBF2, a known cholesterol master-regulatory transcription factor<sup>18,19,20</sup>. After  
89 downloading the FASTA files of the sequences for peaklets proximal and distal to the 64 DE  
90 cholesterol metabolic genes from the *Regeneration Rosetta*, AME motif analysis<sup>21</sup> revealed that  
91 mostly proximal open chromatin were enriched in the SREBF2 motif resulting in 23% sequence  
92 enrichment. We found a number of genes with temporal expression profiles similar to SREBF2  
93 that are proximal to these accessible binding sites, including *dhcr24*, *hmgcs1*, *hsd17b7*, *insig1*,  
94 *sqlea*, and *idi1* (Figure 2A). Interestingly, the proximal and distal peaks of *sreb1*, which exhibited  
95 peak expression during brain reinnervation (7-12 dpi), were also enriched for SREBF2 motifs;  
96 SREBF1 is a transcription factor related to SREBF2 that is known to regulate genes involved in  
97 fatty acid synthesis and lipid homeostasis<sup>21,22,23</sup>, both of which have been shown to be important  
98 for axon growth and myelination during neurogenesis<sup>23-25</sup>. This suggests that SREBF2 could  
99 potentially regulate the transcriptional activity of SREBF1, which, in turn, promotes the expression  
100 of genes associated with later regenerative processes.

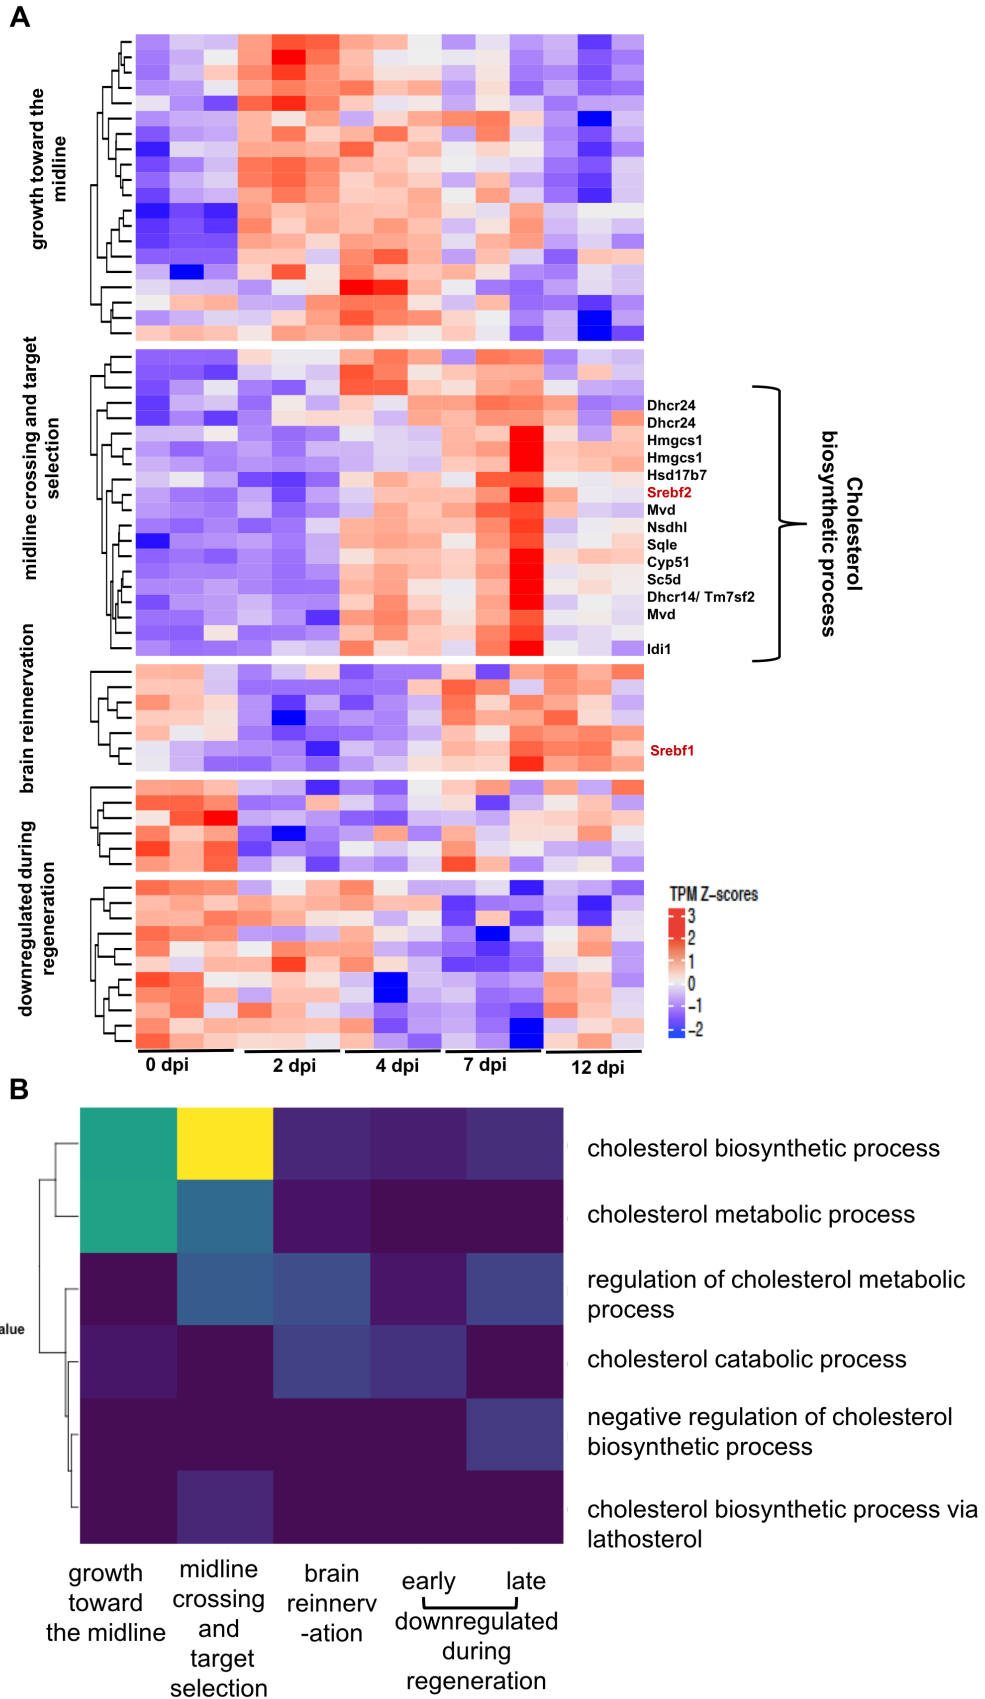

102 **Figure 2: *Regeneration Rosetta* app identifies process-specific analysis after optic nerve injury.** (A)  
103 Temporal transcript profiles of genes in the cholesterol metabolic pathway. Relative transcript counts from  
104 retinas dissected 2-, 4-, 7- and 12-days post injury (dpi) were compared with those from uninjured animals  
105 (0 dpi). Transcript expression is presented as TPM Z-scores; putative SREBF2 target genes are indicated  
106 to the right of the heatmap (biosynthetic enzymes in black; transcription factors are in red). (B) Specific  
107 enrichment of cholesterol metabolic and biosynthetic genes early in regeneration. Fisher's exact test of  
108 over-representation was used to identify cholesterol-related GO-terms correlated with specific stages of  
109 regeneration.

## 110 ***Regeneration Rosetta provides insight into evolutionary conserved regenerative*** 111 ***mechanisms***

112 Nervous system function is dependent on the development of highly specific connections between  
113 neurons and their direct targets. The molecular mechanisms regulating this network of  
114 connections are highly conserved across evolution<sup>26, 27</sup>. Unlike mammals, vertebrates such as fish  
115 and amphibians exhibit regenerative abilities of complex tissues and structures. Therefore,  
116 comparing regenerative capabilities across species will enable researchers to identify genes and  
117 transcriptional networks that are critical to the regenerative program.

118  
119 To facilitate a cross-species comparison, the *Regeneration Rosetta* app enables queries of  
120 patterns of gene expression across injury models with different regenerative capacities. To  
121 illustrate, we compared CNS regeneration in lamprey and zebrafish. Following<sup>27,28</sup>, we used the  
122 regenerating lamprey transcriptional profiles from cell bodies located in the brain and spinal cord  
123 following spinal cord injury over a course of 12 weeks. This study identified 3,664 and 3,999  
124 differentially expressed regeneration-associated genes at one or more post-injury time points in  
125 lamprey brain and spinal cord, respectively. After removing duplicates, we filtered these lists to  
126 2,325 (brain) and 2,520 (spinal cord) differentially expressed genes. We looked for an overlap of  
127 genes that were differentially regulated after injury to the zebrafish optic nerve and the lamprey  
128 spinal cord and brain. We found 3,298 transcripts (corresponding to 1,971 genes) and 3,722  
129 transcripts (corresponding to 2,151 genes) in the zebrafish optic regeneration data corresponding  
130 to the lamprey spinal cord and brain, respectively. After subsetting to those that were differential

131 in the zebrafish (FDR < 5%), we identified 674 (spinal cord) and 728 (brain) differentially  
132 expressed genes (nearly 28% of genes identified as differentially expressed in any one study or  
133 more) common to the zebrafish optic regeneration, lamprey brain, and lamprey spinal cord (Fig.  
134 3), suggesting a considerable overlap between the two regenerative models and three different  
135 tissue types.

136 To identify the core transcription factors that could potentially regulate stage-specific  
137 regeneration-associated gene transcription in both injury models, we cross referenced the  
138 lamprey list of DE transcripts to a recently compiled list of human transcription factors<sup>29</sup>. We  
139 identified 105 brain- and 72 spinal- transcription factor encoding genes that were differentially  
140 expressed at one or more post-injury time points (Table S3 and S4). Assessing the combined list  
141 of DE transcription factors, the *Regeneration Rosetta* revealed that 17 transcripts corresponding  
142 to 8 transcription factor encoding genes are common among neurons in the lamprey spinal cord  
143 and brain, and zebrafish retina (Fig. 3). Thus, the *Regeneration Rosetta* highlights potential  
144 regulatory factors driving regeneration-associated gene expression among regenerative  
145 organisms.



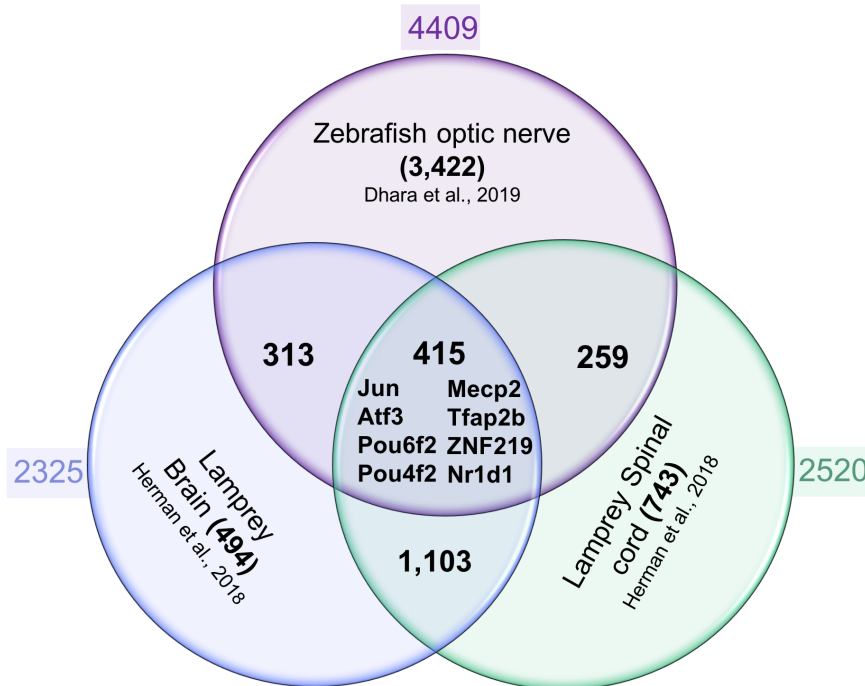

146

147 **Figure 3. Regeneration Rosetta app identifies conserved core regulators of CNS axon regeneration.**

148 Venn diagram of axon growth-associated genes from regenerating CNS neurons from zebrafish and  
149 lamprey. Approximately 10-15% of regeneration-associated genes are shared between neurons  
150 regenerating axons in brain, spinal cord and optic nerve, including a core set of 8 regeneration-associated  
151 transcription factors.

152

## 153 Discussion

154 The *Regeneration Rosetta* interactive web app represents a rich resource of fully processed,  
155 analyzed, and queryable data from a unique study of regeneration-associated gene expression  
156 and chromatin accessibility during optic nerve regeneration in Dhara et al. (2109). The app was  
157 a crucial component for generating and interpreting results in Dhara et al. (2019), as it facilitated  
158 a deep interrogation of the data that would have otherwise only been possible with extensive  
159 bioinformatic expertise. In addition, we have illustrated the broad utility of the *Regeneration*  
160 *Rosetta* app through examples focusing on time-dependent regulation during regeneration for  
161 specific biological processes of interest and regenerative mechanisms that are evolutionarily  
162 conserved across species and tissue types. The *Regeneration Rosetta* app will be widely useful,  
163 both for further investigation and interpretation of the data from Dhara et al. (2019) and for

164 hypothesis generation in other organisms. We expect these use cases of the app to inform the  
165 design of future functional studies that are crucial for translating basic biological insights into new  
166 therapeutics for optic nerve injury.

## 167 **Methods**

### 168 *Experimental design, data generation, and bioinformatic analyses*

169 Comprehensive experimental details may be found in Dhara et al. (2019). Briefly, whole retinas  
170 were dissected from 7-9 month old adult zebrafish at 0, 2, 4, 7, or 12 days post injury (dpi),  
171 following an optic nerve crush lesion ( $n=3$  at each time point). After extracting total RNA from  
172 these samples, RNA-seq libraries were prepared and sequenced as previously described. Retinal  
173 ganglion cells (RGCs) were collected from retinas at each time point using fluorescent activated  
174 cell sorting (FACS) and chromatin was subsequently isolated. ATAC-seq libraries were prepared  
175 and sequenced as previously described<sup>7</sup>. One ATAC-seq library was dropped due to poor  
176 sequence quality.

177 For the RNA-seq data, after merging technical replicates and validating sequence quality we  
178 quantified transcript abundance<sup>9</sup> and tested differential expression with respect to the initial time  
179 point (0dpi)<sup>10</sup>, controlling the false discovery rate at 5%. For the ATAC-seq data, sequences were  
180 aligned<sup>11</sup> to the zebrafish reference and open chromatin regions were called<sup>12</sup>. For each region  
181 with a p-value < 10e-10, a 500bp “peaklet” was defined by anchoring on the mode of the peak  
182 signal<sup>13</sup>. Chromatin accessibility was quantified by counting the number of overlapping reads for  
183 each retained peaklet, and differential accessibility was calculated with respect to the initial time  
184 point (0dpi)<sup>14</sup>, controlling the false discovery rate at 5%. Software versions and parameters are  
185 provided in Dhara et al. (2019). All genomic coordinates and annotations are reported with respect  
186 to the GRCz10 *Danio rerio* genome assembly and Ensembl 90 gene annotation for the zebrafish.

### 187 *Integration of RNA-seq and ATAC-seq data*

188

189 To link regions of accessible chromatin with gene expression, we calculated peaklet-to-gene  
190 distance based on the coordinates of the peaklet mode and the gene's transcription start site  
191 (TSS). A proximal peaklet was then defined as one that overlaps the TSS and/or is within  $\pm 1$ kb of  
192 the TSS, while a distal peaklet was defined as one within  $\pm 100$ kb of the TSS but not proximal.  
193 Users can optionally remove exonic peaklets from these lists, defined as those within 50bp of  
194 exonic regions but not overlapping a TSS. To identify genes that are proximal or distal to a given  
195 set of accessible chromatin (whether user-provided or through the built-in lists of differentially  
196 accessible chromatin provided in the app), users may choose to include all genes or only a subset  
197 of those identified to be DE at a particular time point.

198 For peaklets identified as proximal or distal to the query set of genes, a FASTA file of sequences  
199 and BED file of genomic coordinates may be downloaded by the user for further analysis; in  
200 addition, a CSV file providing the potentially many-to-many correspondences of proximal and  
201 distal peaklets to genes may also be downloaded.

#### 202 *Gene expression visualization and queries for alternative species*

203

204 Several built-in gene lists, based on the results described in Dhara et al. (2019), are directly  
205 available within the *Regeneration Rosetta* app. These include the lists of DE genes (based on an  
206 FDR adjusted p-value  $< 0.01$ ) compared to 0dpi, as well as pre-identified clusters with expression  
207 patterns roughly corresponding to established events in the regeneration process (down-  
208 regulation during early-, mid-, or late-regeneration, growth toward the midline, midline crossing,  
209 target selection, and brain innervation). Users may also employ the *Regeneration Rosetta* app to  
210 explore gene sets for one of 68 species (Table S1) in addition to zebrafish by providing the  
211 relevant Ensembl gene IDs<sup>15</sup>. These converted gene lists can be further narrowed to include only  
212 those genes found to be DE post-injury.

213

214 For a given set of genes, expression heatmaps using log fold-changes, log transcripts per million  
215 (TPM), or Z-scores of these measures are produced using *ComplexHeatmap*<sup>16</sup>, where transcript  
216 clusters are identified for a given number of clusters using the K-means algorithm, and rows are  
217 ordered within each cluster according to hierarchical clustering (Euclidean distance, complete  
218 linkage). Samples may also be hierarchically clustered. A high-resolution heatmap may be resized  
219 and downloaded by the user.

## 220 *Functional enrichment analysis*

221

222 The *Regeneration Rosetta* performs on-the-fly functional enrichment analyses of GO terms for  
223 Biological Processes (BP), Cellular Components (CC), and Molecular Function (MF) for a given  
224 gene set using *topGO* (*weight01* algorithm, Fisher test statistic, and gene universe defined as  
225 the set of expressed transcripts from Dhara et al. (2019)). P-values are not adjusted for multiple  
226 correction, and only GO terms with raw p-values < 0.05 are reported; tables of enriched GO terms  
227 are displayed in an HTML table in the app and may be optionally downloaded as a CSV file, Excel  
228 spreadsheet, or PDF file.

229

## 230 *Technical details of the Regeneration Rosetta*

231 The *Regeneration Rosetta* interactive web app was built in R using the *Shiny* and *flexdashboard*  
232 packages. In addition to the other software packages already cited above, it makes use of the  
233 *data.table* and *RSQLite* R packages for fast data manipulation, *DT* for rendering HTML tables  
234 using JavaScript, *readxl* for parsing data from Excel spreadsheets, *dplyr* for data manipulation,  
235 and *tokenizers* to convert user-provided gene IDs into tokens.

236

237 **Web resources:**

- 238 • The *Regeneration Rosetta* R/Shiny application is available at [http://ls-shiny-](http://ls-shiny-prod.uwm.edu/rosetta/)  
239 [prod.uwm.edu/rosetta/](http://ls-shiny-prod.uwm.edu/rosetta/). A FAQ page is available directly on the app website.
- 240 • Source code for the *Regeneration Rosetta* app is available from GitHub:  
241 <https://github.com/andreamrau/rosetta>. The processed data used within the app are  
242 directly located in <https://github.com/andreamrau/rosetta/tree/master/data>; scripts used to  
243 process the raw data from Dhara et al. (2019) may be found at  
244 [https://github.com/andreamrau/OpticRegen\\_2019](https://github.com/andreamrau/OpticRegen_2019).
- 245 • Archived source code at the time of publication can be found at  
246 <https://doi.org/10.5281/zenodo.2658771>.
- 247 • Software licence (GPL-3)

248

249

250 **Acknowledgments**

251 We thank the [UWM High Performance Computing \(HPC\) Service](#) for computing resources used  
252 in this work. We are grateful to Maria Replogle for comments on the manuscript. We wish to thank  
253 the University of Wisconsin Biotechnology Center DNA Sequencing Facility, Madison for providing  
254 RNA and ATAC sample sequencing facilities. We gratefully acknowledge support from the  
255 Research Growth Initiative Grant -RGI (to P.L.A. and A.J.U.), University of Wisconsin-Milwaukee.  
256 A.R. was supported by the AgreenSkills+ fellowship program, which received funding from the  
257 EU's Seventh Framework Program under grant agreement number FP7-609398 (AgreenSkills+  
258 contract). S.P.D. was supported by the Clifford Mortimer Distinguished Scholar Award, University  
259 of Wisconsin-Milwaukee.

260

261

## 262 Literature Cited

- 263 1. Crair, M. C. & Mason, C. A. Reconnecting Eye to Brain. *J. Neurosci.* **36**, 10707–10722  
264 (2016).
- 265 2. Diekmann, H., Kalbhen, P. & Fischer, D. Characterization of optic nerve regeneration using  
266 transgenic zebrafish. *Front. Cell. Neurosci.* **9**, 118 (2015).
- 267 3. Erskine, L. & Herrera, E. Connecting the retina to the brain. *ASN Neuro* **6**, (2014).
- 268 4. Skene, J. H. Axonal growth-associated proteins. *Annu. Rev. Neurosci.* **12**, 127–156 (1989).
- 269 5. Moore, D. L. & Goldberg, J. L. Multiple transcription factor families regulate axon growth  
270 and regeneration. *Dev. Neurobiol.* **71**, 1186–1211 (2011).
- 271 6. Smith, D. S. & Skene, J. H. A transcription-dependent switch controls competence of adult  
272 neurons for distinct modes of axon growth. *J. Neurosci.* **17**, 646–658 (1997).
- 273 7. Dhara, S. *et al.* Regulation of CNS regeneration-associated genes is driven by a temporally  
274 changing cast of transcription factors. *bioRxiv*, doi: <https://doi.org/10.1101/638734>.
- 275 8. Bailey, T. L. *et al.* MEME SUITE: tools for motif discovery and searching. *Nucleic Acids*  
276 *Research* **37**, W202–W208 (2009).
- 277 9. Bray, N. L., Pimentel, H., Melsted, P. & Pachter, L. Near-optimal probabilistic RNA-seq  
278 quantification. *Nat. Biotechnol.* **34**, 525–527 (2016).
- 279 10. Pimentel, H., Bray, N. L., Puente, S., Melsted, P. & Pachter, L. Differential analysis of RNA-  
280 seq incorporating quantification uncertainty. *Nat. Methods* **14**, 687–690 (2017).
- 281 11. Li, H. & Durbin, R. Fast and accurate short read alignment with Burrows-Wheeler  
282 transform. *Bioinformatics* **25**, 1754–1760 (2009).
- 283 12. Zhang, Y. *et al.* Model-based analysis of ChIP-Seq (MACS). *Genome Biol.* **9**, R137 (2008).
- 284 13. Lawrence, M. *et al.* Software for computing and annotating genomic ranges. *PLoS Comput.*  
285 *Biol.* **9**, e1003118 (2013).
- 286 14. Love, M. I., Huber, W. & Anders, S. Moderated estimation of fold change and dispersion for  
287 RNA-seq data with DESeq2. *Genome Biol.* **15**, 550 (2014).

- 288 15. Durinck, S., Spellman, P. T., Birney, E. & Huber, W. Mapping identifiers for the integration  
289 of genomic datasets with the R/Bioconductor package biomaRt. *Nat. Protoc.* **4**, 1184–1191  
290 (2009).
- 291 16. Gu, Z., Eils, R. & Schlesner, M. Complex heatmaps reveal patterns and correlations in  
292 multidimensional genomic data. *Bioinformatics* **32**, 2847–2849 (2016).
- 293 17. Wang, Z. *et al.* KLF6 and STAT3 co-occupy regulatory DNA and functionally synergize to  
294 promote axon growth in CNS neurons. *Sci. Rep.* **8**, 12565 (2018).
- 295 18. Smith, C. L. *et al.* Mouse Genome Database (MGD)-2018: knowledgebase for the  
296 laboratory mouse. *Nucleic Acids Res.* **46**, D836–D842 (2018).
- 297 19. Roux, P. & Fisher, R. M. Chest injuries in children: an analysis of 100 cases of blunt chest  
298 trauma from motor vehicle accidents. *J. Pediatr. Surg.* **27**, 551–555 (1992).
- 299 20. Madison, B. B. Srebp2: A master regulator of sterol and fatty acid synthesis. *J. Lipid Res.*  
300 **57**, 333–335 (2016).
- 301 21. McLeay, R. C. & Bailey, T. L. Motif Enrichment Analysis: a unified framework and an  
302 evaluation on ChIP data. *BMC Bioinformatics* **11**, 165 (2010).
- 303 22. Ye, J. & DeBose-Boyd, R. A. Regulation of cholesterol and fatty acid synthesis. *Cold Spring*  
304 *Harb. Perspect. Biol.* **3**, (2011).
- 305 23. Ferré, P. & Foufelle, F. SREBP-1c transcription factor and lipid homeostasis: clinical  
306 perspective. *Horm. Res.* **68**, 72–82 (2007).
- 307 24. Salles, J. *et al.* Acetyl-CoA carboxylase and SREBP expression during peripheral nervous  
308 system myelination. *Biochim. Biophys. Acta* **1631**, 229–238 (2003).
- 309 25. Dietschy, J. M. & Turley, S. D. Thematic review series: brain Lipids. Cholesterol metabolism  
310 in the central nervous system during early development and in the mature animal. *J. Lipid*  
311 *Res.* **45**, 1375–1397 (2004).
- 312 26. Jiang, X. & Nardelli, J. Cellular and molecular introduction to brain development. *Neurobiol.*  
313 *Dis.* **92**, 3–17 (2016).

- 314 27. Kaprielian, Z., Imondi, R. & Runko, E. Axon guidance at the midline of the developing CNS.  
315 *Anat. Rec.* **261**, 176–197 (2000).
- 316 28. Herman, P. E. *et al.* Highly conserved molecular pathways, including Wnt signaling,  
317 promote functional recovery from spinal cord injury in lampreys. *Sci. Rep.* **8**, 742 (2018).
- 318 29. Lambert, S. A. *et al.* The Human Transcription Factors. *Cell* **172**, 650–665 (2018).

319  
320  
321  
322  
323  
324
